# Supplementary material for: Metal–organic coordination architectures with 3-pyridin-3-yl-benzoate: crystal structures, fluorescent emission and magnetic properties
Source: Royal Society of Chemistry journal article supplement (doi:10.1039/b714491a), 2008-01-01
Supplement: b714491a.pdf [file b714491a.pdf]

*Electronic Supplementary Information*

**Metal–Organic coordination architectures with  
3-pyridin-3-yl-benzoate: crystal structures, fluorescent emission and  
magnetic properties**

*Rui-Qin Zhong,<sup>a,b</sup> Ru-Qiang Zou,<sup>a,b</sup> Miao Du,<sup>a</sup> Ling Jiang,<sup>a</sup> Tetsuya Yamada,<sup>c</sup> Goro Maruta,<sup>c</sup> Sadamu Takeda<sup>c</sup> and Qiang Xu<sup>\*a,b</sup>*

<sup>a</sup> *National Institute of Advanced Industrial Science and Technology (AIST), Ikeda, Osaka 563-8577, Japan*

<sup>b</sup> *Graduate School of Engineering, Kobe University, Nada Ku, Kobe, Hyogo 657-8501, Japan*

<sup>c</sup> *Department of Chemistry, Faculty of Science and Graduate School of Science, Hokkaido University, Sapporo 060-0810, Japan*

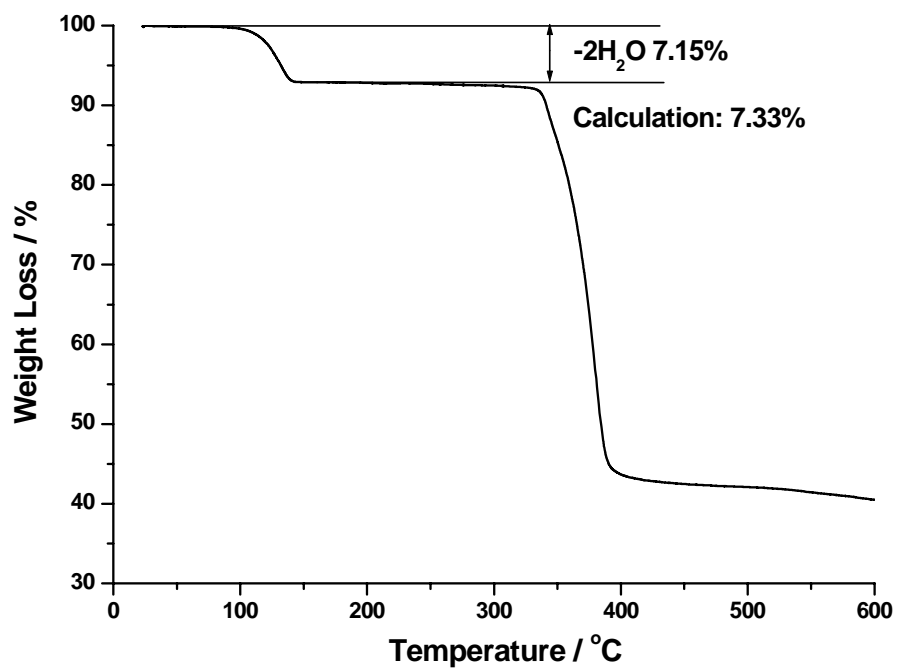

**Fig. S1** TG curve of **1**.

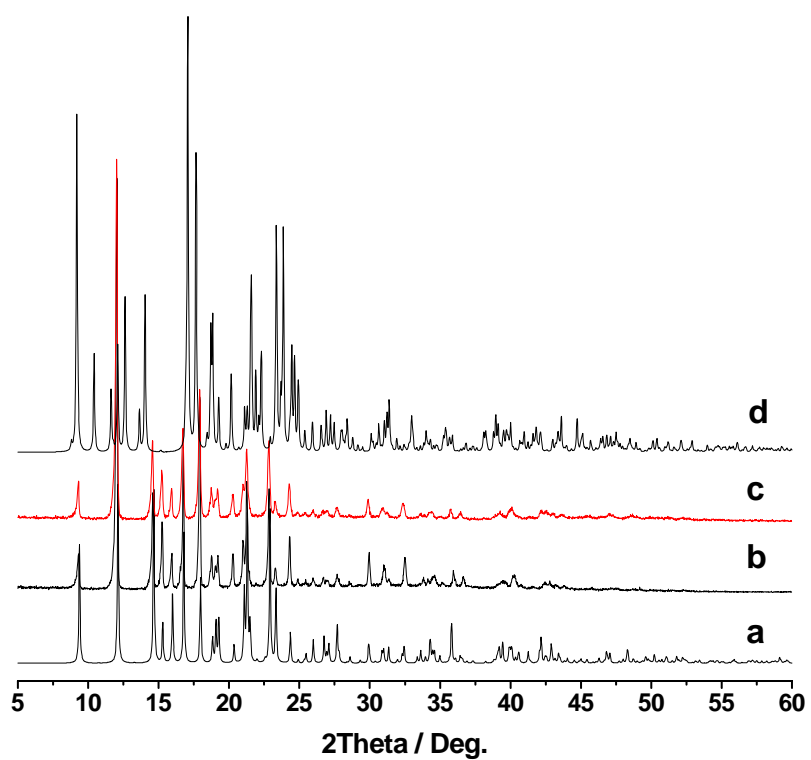

**Fig. S2** PXRD patterns of: (a) simulated of **1**, (b) as made of **1**, (c) dehydrated **1** and (d) simulated of **2**.
